# Supplementary material
Source: Research Square preprint supplement (doi:10.21203/rs.3.rs-9282067/v1)
Supplement: Supplementary file 1 [file 0468e8513c99f82212722383.docx]

**1 Molecular Simulation**

**1.1 Structure Modeling**

The amino acid sequence of the human mitogen-activated protein kinase 14 (MAPK14) was retrieved from the UniProt database (Q16539). To ensure structural completeness, especially for the flexible activation loop containing the critical phosphorylation sites Thr180 and Tyr182, the 3D structure was constructed using AlphaFold31. Existing crystal structures from the PDB database were utilized as templates to guide the modeling, ensuring the catalytic machinery and regulatory motifs were accurately represented. This high-confidence model served as the receptor for investigating the inhibitory mechanism of the ligand on MAPK14 phosphorylation. For the ligand, the 3D structure of Periplocymarin (PubChem CID: 12305974) was obtained.

**1.2 Molecular Docking**

To investigate the inhibitory potential of Periplocymarin, targeted molecular docking was performed using xDock2. Given the experimental evidence that the drug inhibits the phosphorylation of Thr180 and Tyr182, the docking grid was strategically defined to encompass both the ATP-binding pocket and the adjacent phosphorylation-related motifs. The docking utilized an exhaustiveness of sampling with the parameters -NumOutPose 20 -GenConfs 200 -ClashScore 2.0. The complex conformation exhibiting the most favorable interactions within the ATP/phosphorylation-site cavity was selected for further analysis.

**1.3 Ligand Parameterization and Topology Generation**

The coordinates of Periplocymarin were extracted from the docked complex, and a single-point energy calculation was performed using ORCA 6.1.03 to generate the electronic wavefunction. This calculation utilized the B3LYP4,5 functional with Grimme’s D36 dispersion correction and the def2-TZVP7 basis set, accelerated by the RIJCOSX approximation and the def2/J auxiliary basis set. Subsequently, RESP2 charges were fitted using the Multiwfn8 program to ensure an accurate representation of the ligand's electrostatic potential. The final force field topology and parameters were generated via Sobtop, integrating the RESP2 charges with GAFF29.

**1.4 Molecular Dynamics**

Molecular dynamics (MD) simulations were conducted using GROMACS 2025.310 for a total duration of 100 ns. The MAPK14 protein was modeled with the AMBER ff14SB force field11, while the ligand was described by the previously generated parameters. The complex was immersed in a cubic simulation box solvated with TIP3P water molecules. To maintain physiological conditions, the system was neutralized with Na+ and Cl- ions at a concentration of 0.15 M. The MD protocol comprised: (1) Energy minimization using the steepest descent algorithm; (2) NVT equilibration (100 ps) to heat the system to 300 K; (3) NPT equilibration (2 ns) at 300 K and 1 bar; and (4) a 100 ns production run under NPT conditions. The V-rescale thermostat12 and C-rescale barostat13 were employed for temperature and pressure coupling, respectively. Long-range electrostatic interactions were computed using the Particle Mesh Ewald (PME) method, and hydrogen bonds were constrained using the LINCS algorithm.

**1.5 Binding Free Energy Calculation**

The binding free energy between MAPK14 and Periplocymarin was estimated using the MM/GBSA method implemented in the gmx_MMPBSA tool14. The GB-Neck2 model15 was applied to account for the solvation free energy. All thermodynamic parameters, including force fields and environmental conditions, were maintained consistent with the MD production settings to ensure data validity.
